# Supplementary material for: Radiologically Defined Sarcopenia as a Biomarker for Frailty and Malnutrition in Head and Neck Skin Cancer Patients
Source: MDPI journal article supplement (doi:10.3390/jcm12103445), 2023-05-13
Supplement: s1 [file s1]

**Table S1.** The geriatric assessment at baseline, showing a range of validated instruments on multiple domains with applied cut-off values. ACE-27 = Adult Comorbidity Evaluation 27, ADL = Activities of Daily Living, G8 = Geriatric 8, GDS-15 = Geriatric Depression Scale 15, GFI = Groningen Frailty Indicator, MMSE = Mini Mental State Examination, MUST = Malnutrition Universal Screening Tool, TUG = Timed Up and Go.

|                                             | Abbreviation | Cut-off value                       |
|---------------------------------------------|--------------|-------------------------------------|
| <b>Frailty indicators</b>                   |              |                                     |
| Geriatrics 8(41)                            | G8           | Frail: G8 $\leq$ 14                 |
| Groningen Frailty indicator(42)             | GFI          | Frail: GFI $\geq$ 4                 |
| <b>Comorbidities</b>                        |              |                                     |
| Adult Comorbidity Evaluation-27(43)         | ACE-27       | Moderate to severe: ACE-27 $\geq$ 2 |
| <b>Polypharmacy</b>                         |              |                                     |
| Medication count(44)                        |              | Polypharmacy: medications $\geq$ 5  |
| <b>Nutritional status</b>                   |              |                                     |
| Malnutrition Universal Screening Tool(45)   | MUST         | Medium to high risk: MUST $\geq$ 1  |
| <b>Functional status</b>                    |              |                                     |
| Activities of Daily Living(46)              | ADL          | Restrictions: ADL $\geq$ 2          |
| Instrumental Activities of Daily Living(47) | IADL         | Restrictions: IADL $\geq$ 1         |
| Timed Up and Go(48)                         | TUG          | Restrictions: TUG $\geq$ 20         |
| History of falls                            |              | Yes                                 |
| <b>Social support</b>                       |              |                                     |
| Education                                   |              | Low level                           |
| Relationship                                |              | Not in a relationship               |
| <b>Cognitive status</b>                     |              |                                     |
| Mini Mental State Examination(49)           | MMSE         | Declined cognition: MMSE $\leq$ 24  |
| Risk of delirium(50)                        |              | Yes                                 |
| <b>Psychological status</b>                 |              |                                     |
| Geriatric Depression Scale-15(51)           | GDS-15       | Depression: GDS-15 $\geq$ 6         |

**Table S2.** Remaining variables of the univariate linear regression analysis with SMI as dependent and the univariate logistic regression analysis with low SMI and POC as dependent. Significant P-values ( $\alpha < 0.05$ ) are curved and bold. (\*) Manually added one value into blank cell to generate odds ratios. 95%CI = 95% Confidence Interval, ADL = Activities of Daily Living, B = Beta, GDS-15 = Geriatric Depression Scale 15, IADL = Instrumental Activities of Daily Living, MMSE = Mini Mental State Examination, OR = Odds Ratio, POC = Postoperative Complication, SD= standard deviation, SMI = Skeletal Muscle Index.

|                       | SMI                  |         | Low SMI             |         | POC                  |         |
|-----------------------|----------------------|---------|---------------------|---------|----------------------|---------|
|                       | OR (95% CI)          | p-value | B (95% CI)          | p-value | OR (95% CI)          | p-value |
| Reason for referral   |                      |         |                     |         |                      |         |
| Primary               | Ref                  |         | Ref                 |         | Ref                  |         |
| Residual or recurrent | -2.41 (-5.98 – 1.16) | 0.182   | 1.83 (0.57 – 5.92)  | 0.311   | 2.44 (0.82 – 7.29)   | 0.109   |
| Tumor size, cm        | 0.02 (-0.09 – 0.12)  | 0.733   | 1.01 (0.98 – 1.04)  | 0.684   | 1.00 (0.97 – 1.03)   | 0.885   |
| Histopathology        |                      |         |                     |         |                      |         |
| Keratinocyte          | Ref                  |         | Ref                 |         | Ref                  |         |
| Other                 | 4.78 (-2.18 – 11.75) | 0.172   | 0.28 (0.06 – 1.40)  | 0.120   | 0.64 (0.19 – 2.10)   | 0.456   |
| Invasion depth , mm   | 0.05 (-0.83 – 0.92)  | 0.915   | 1.12 (0.86 – 1.45)  | 0.390   | 1.29 (0.96 – 1.75)   | 0.094   |
| Medication count      |                      |         |                     |         |                      |         |
| <5 medications        | Ref                  |         | Ref                 |         | Ref                  |         |
| ≥ 5 medications       | 3.59 (-0.50 – 7.69)  | 0.084   | 0.32 (0.059– 1.70)  | 0.180   | 1.77 (0.45 – 6.98)   | 0.418   |
| ADL                   |                      |         |                     |         |                      |         |
| No restrictions (<2)  | Ref                  |         | Ref                 |         | Ref                  |         |
| Restrictions (≥2)     | -2.68 (-9.73 – 4.36) | 0.449   | 1.30 (0.13 – 13.44) | 0.827   | 2.13 (0.21 – 21.84)* | 0.525*  |
| IADL                  |                      |         |                     |         |                      |         |
| No restrictions (<1)  | Ref                  |         | Ref                 |         | Ref                  |         |
| Restrictions (≥ 1)    | -0.36 (-4.39 – 3.66) | 0.857   | 2.10 (0.54 – 8.18)  | 0.285   | 0.98 (0.27 – 3.52)   | 0.976   |
| History of falls      |                      |         |                     |         |                      |         |
| No                    | Ref                  |         | Ref                 |         | Ref                  |         |
| Yes                   | -0.96 (-7.35 – 5.43) | 0.765   | 0.57 (0.058 – 5.58) | 0.630   | 0.88 (0.13 – 5.80)   | 0.894   |
| Education             |                      |         |                     |         |                      |         |
| Low level             | Ref                  |         | Ref                 |         | Ref                  |         |
| Middle and high level | 2.69 (-0.97 – 6.32)  | 0.147   | 1.52 (0.36 – 6.37)  | 0.570   | 1.23 (0.33 – 4.49)   | 0.759   |
| Relationship          |                      |         |                     |         |                      |         |
| No                    | Ref                  |         | Ref                 |         | Ref                  |         |
| Yes                   | -0.96 (-7.35 – 5.43) | 0.765   | 1.36 (0.42 – 4.39)  | 0.612   | 0.46 (0.12 – 1.74)   | 0.253   |
| MMSE                  |                      |         |                     |         |                      |         |

|                                  |                      |       |                     |       |                      |        |
|----------------------------------|----------------------|-------|---------------------|-------|----------------------|--------|
| Normal cognition (> 24)          | Ref                  |       | Ref                 |       | Ref                  |        |
| Declined cognition ( $\leq 24$ ) | -0.23 (-5.44 – 4.97) | 0.929 | 1.73 – 0.34 – 8.76) | 0.506 | 1.0 (0.20 – 4.82)    | 0.985  |
| Risk of delirium                 |                      |       |                     |       |                      |        |
| No                               | Ref                  |       | Ref                 |       | Ref                  |        |
| Yes                              | 1.45 (-3.29 – 6.19)  | 0.542 | 0.53 (0.10 – 2.82)  | 0.460 | 1.6 (0.4 – 6.9)      | 0.541  |
| GDS-15                           |                      |       |                     |       |                      |        |
| No depression (< 6)              | Ref                  |       | Ref                 |       | Ref                  |        |
| Depression ( $\geq 6$ )          | 0.30 (-9.53 – 10.13) | 0.952 | 2.64 (0.15 – 45.91) | 0.506 | 2.13 (0.21 – 21.84)* | 0.525* |

**Table S3.** Multivariable linear regression analysis with SMI as dependent variable. Significant P-values ( $\alpha < 0.05$ ) are curved and underscored.(\*)  
Adjusted for drinking. 95%CI = 95% Confidence Interval, B = Beta, G8 = Geriatric 8, MUST = Malnutrition Universal Screening Tool, OR = Odds Ratio, SMI = Skeletal Muscle Index.

|                   | SMI as dependent<br>B (95% CI) | p-value           |
|-------------------|--------------------------------|-------------------|
| Sex               |                                |                   |
| Male              | Ref                            |                   |
| Female            | -7.36 (-10.56 – -4.16)*        | <u>&lt;0.001*</u> |
| Smoking           |                                |                   |
| Never             | Ref                            |                   |
| Former or current | 3.15 (0.17 – 6.34)*            | <u>0.039*</u>     |
